# Supplementary material
Source: PubMed Central journal article supplement (PMC7730863)
Supplement: NIHMS1608376-supplement-1.pdf [file NIHMS1608376-supplement-1.pdf]

*Supporting Information*

**Structural Basis of EGFR Mutant Inhibition by Trisubstituted Imidazole Inhibitors**

David E. Heppner,<sup>a,b</sup> Marcel Günther,<sup>c</sup> Florian Wittlinger,<sup>c</sup> Stefan Laufer,<sup>c</sup> Michael J. Eck<sup>a,b</sup>

<sup>a</sup>Department of Cancer Biology, Dana-Farber Cancer Institute, Boston, MA 02215, USA.

<sup>b</sup>Department of Biological Chemistry and Molecular Pharmacology, Harvard Medical School,  
Boston, MA 02115, USA.

<sup>c</sup>Institute for Pharmaceutical Sciences, Eberhard Karls Universität Tübingen, Tübingen 72076,  
Germany.

**Table of Contents**

**Table S1.** Crystallographic data collection and refinement statistics for EGFR(T790M/V948R) crystals.

| PDB ID Code<br>Inhibitor             | 6V5N<br><b>1 (LN2084)</b>    | 6V5P<br><b>2 (LN2725)</b>    | 6V6O<br><b>3 (LN2380)</b>    |
|--------------------------------------|------------------------------|------------------------------|------------------------------|
| Data collection                      |                              |                              |                              |
| Space group                          | P1 2 <sub>1</sub> 1          | P1 2 <sub>1</sub> 1          | P1 2 <sub>1</sub> 1          |
| Cell dimensions                      |                              |                              |                              |
| a, b, c (Å)                          | 71.1<br>102.12<br>87.38      | 70.36<br>101.61<br>87.17     | 71.5501 102.36<br>173.569    |
| $\alpha, \beta, \gamma$ (°)          | 90.0<br>102.55<br>90.0       | 90.0<br>102.31<br>90.0       | 90<br>101.298<br>90          |
| Resolution* (Å)                      | 51.06 - 2.4<br>(2.486 - 2.4) | 40.24 - 2.3 (2.382<br>- 2.3) | 60.81 - 2.1<br>(2.175 - 2.1) |
| R <sub>merge</sub> *                 | 0.1217 (0.7778)              | 0.07567 (0.6614)             | 0.1149 (0.5684)              |
| I/ $\sigma$ *                        | 12.72 (2.10)                 | 13.91 (2.44)                 | 11.04 (4.04)                 |
| Completeness* (%)                    | 98.71 (97.35)                | 99.11 (98.87)                | 98.45 (97.77)                |
| Multiplicity*                        | 6.9 (5.9)                    | 5.2 (5.0)                    | 7.0 (7.0)                    |
| Refinement                           |                              |                              |                              |
| Resolution (Å)                       | 51.06 - 2.4                  | 40.24 - 2.3                  | 60.81 - 2.1                  |
| No. of Reflections                   | 47126                        | 52834                        | 140813                       |
| R <sub>work</sub> /R <sub>free</sub> | 0.1921/0.2440                | 0.1791/0.1937                | 0.1945/0.2214                |
| No. of Atoms                         |                              |                              |                              |
| Protein                              | 9779                         | 9747                         | 19612                        |
| Ligands/ion                          | 128                          | 131                          | 296                          |
| Water                                | 255                          | 375                          | 1618                         |
| B-factors                            |                              |                              |                              |
| Protein                              | 46.51                        | 45.39                        | 31.06                        |
| Ligand/ion                           | 43.98                        | 40.20                        | 24.79                        |
| Water                                | 44.67                        | 45.97                        | 36.76                        |
| R.m.s deviations                     |                              |                              |                              |
| Bond lengths (Å)                     | 0.011                        | 0.008                        | 0.003                        |
| Bond angles (°)                      | 1.14                         | 0.91                         | 0.68                         |
| Ramachandran                         |                              |                              |                              |
| Most favored                         | 94.92                        | 96.01                        | 97.33                        |
| Allowed                              | 4.00                         | 3.41                         | 2.42                         |
| Outliers                             | 1.08                         | 0.50                         | 0.25                         |

**Table S1 continued.**

| PDB ID Code<br>Inhibitor              | 6V6K<br>4 (LN2057)           | 6V66<br>5 (LN2899)             |
|---------------------------------------|------------------------------|--------------------------------|
| Data collection                       |                              |                                |
| Space group                           | P1 2 <sub>1</sub> 1          | P1 2 <sub>1</sub> 1            |
| Cell dimensions                       |                              |                                |
| a, b, c (Å)                           | 71.5988 102.455<br>174.043   | 71.4802<br>102.448<br>87.4219  |
| $\alpha, \beta, \gamma$ (°)           | 90 101.25 90                 | 90 102.775 90                  |
| Resolution* (Å)                       | 85.35 - 2.2<br>(2.279 - 2.2) | 85.26 - 1.79<br>(1.854 - 1.79) |
| R <sub>merge</sub> *                  | 0.08136 (0.5284)             | 0.1081 (0.796)                 |
| I/ $\sigma$ *                         | 7.80 (2.11)                  | 9.59 (1.95)                    |
| Completeness* (%)                     | 93.67 (95.49)                | 99.61 (99.45)                  |
| Multiplicity*                         | 3.1 (3.1)                    | 7.0 (7.1)                      |
| Refinement                            |                              |                                |
| Resolution (Å)                        | 85.35 - 2.2                  | 85.26 - 1.79                   |
| No. of Reflections                    | 369052                       | 115036                         |
| R <sub>work</sub> / R <sub>free</sub> | 0.2130/ 0.2394               | 0.1844 /0.2235                 |
| No. of Atoms                          |                              |                                |
| Protein                               | 19759                        | 9901                           |
| Ligands/ion                           | 280                          | 160                            |
| Water                                 | 712                          | 996                            |
| B-factors                             |                              |                                |
| Protein                               | 36.59                        | 27.53                          |
| Ligand/ion                            | 29.34                        | 23.88                          |
| Water                                 | 38.02                        | 34.75                          |
| R.m.s deviations                      |                              |                                |
| Bond lengths (Å)                      | 0.007                        | 0.007                          |
| Bond angles (°)                       | 0.95                         | 0.85                           |
| Ramachandran                          |                              |                                |
| Most favored                          | 96.66                        | 97.62                          |
| Allowed                               | 3.01                         | 2.14                           |
| Outliers                              | 0.33                         | 0.25                           |

\*Numbers in parentheses are for the highest resolution shell.



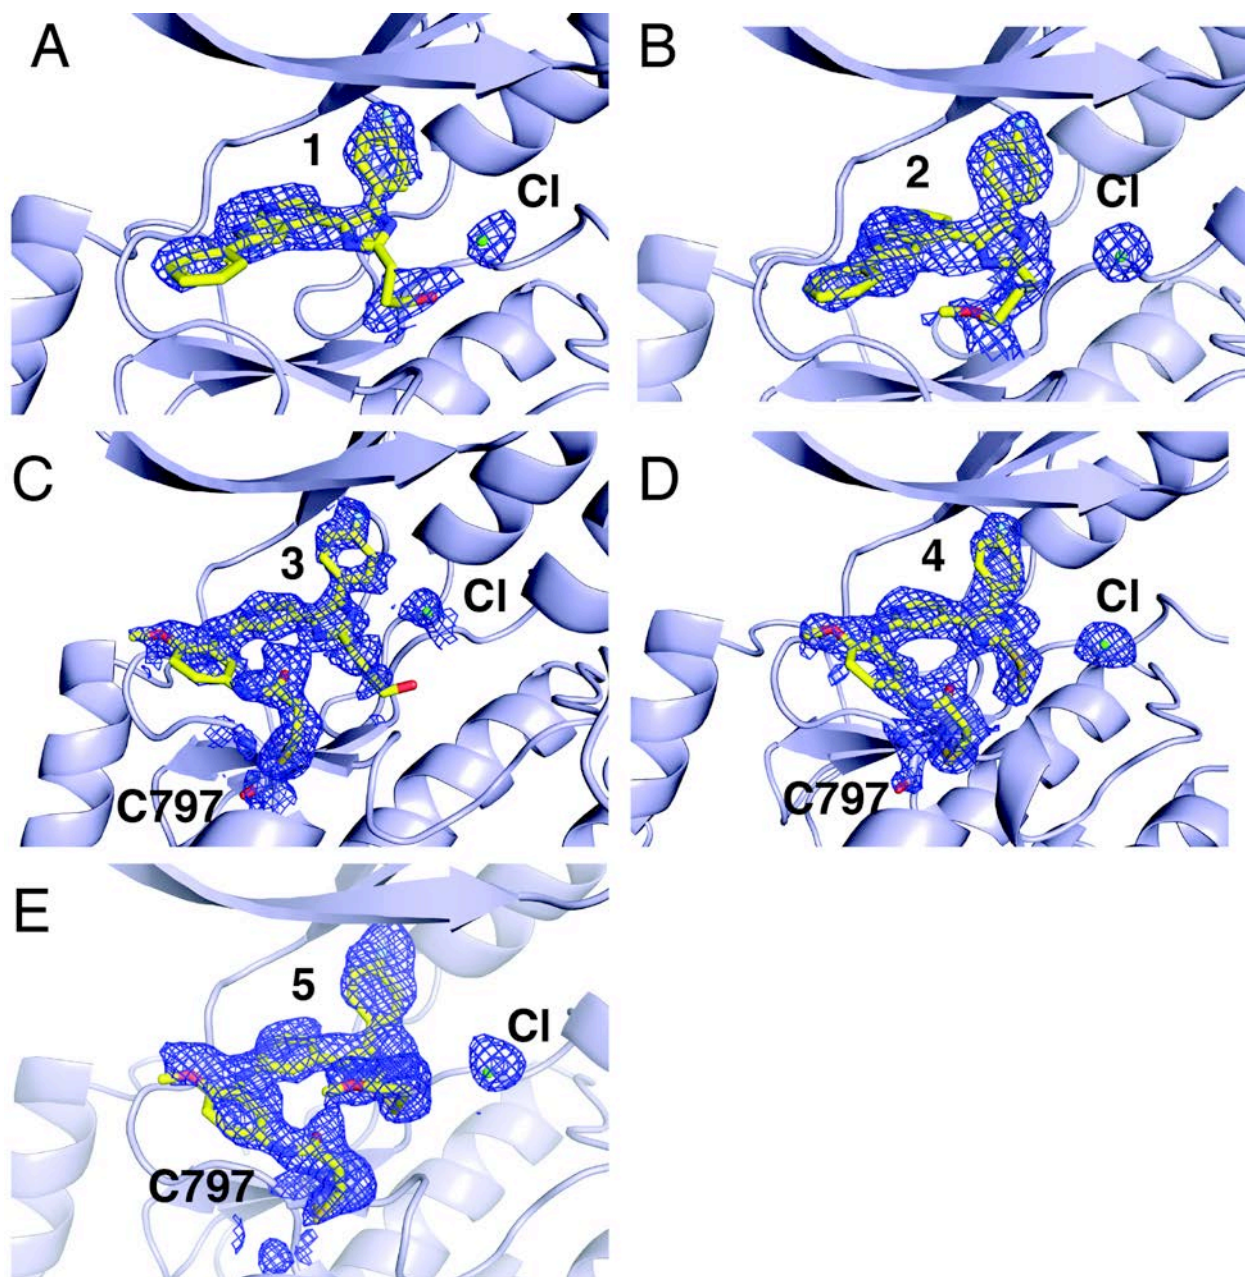

**Figure S2.** mFo-Fc omit maps for EGFR(T790M/V948R) crystal structures with ligand and chloride ion generated by PHENIX for A) 1 B) 2 C) 3 D) 4 E) 5 (contour level  $1.5 \sigma$ )

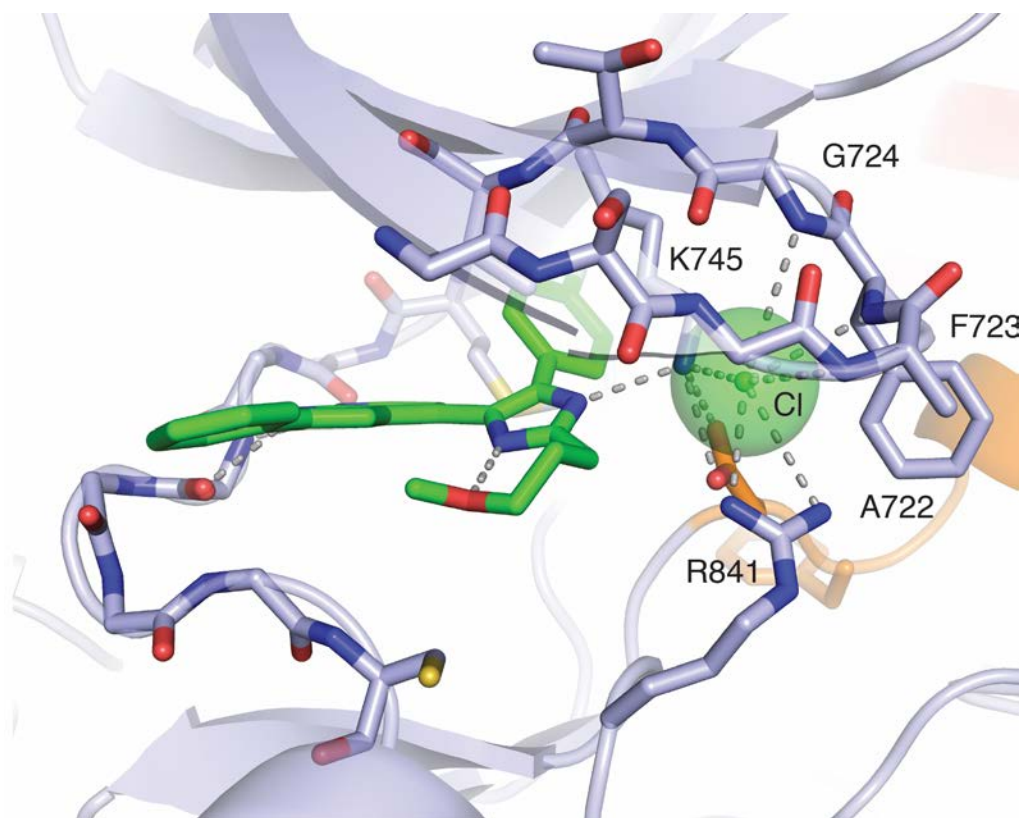

**Figure S3.** Extended view of Figure 2B illustrating the interactions with the ion (modeled as chloride) and positive side and main chain atoms of the EGFR(T790M/V948R) kinase domain.

**Table S2.** Crystallographic data collection and refinement statistics for WT EGFR crystals.

| PDB ID Code                           | 6VH4                       | 6VHN                          | 6VHN                             |
|---------------------------------------|----------------------------|-------------------------------|----------------------------------|
| Inhibitor                             | 3 (LN2360)                 | 4 (LN2057)                    | 5 (LN2899)                       |
| Data collection                       |                            |                               |                                  |
| Space group                           | I23                        | I23                           | I23                              |
| Cell dimensions                       |                            |                               |                                  |
| a, b, c (Å)                           | 146.534 146.534<br>146.534 | 146.865<br>146.865<br>146.865 | 146.811<br>146.811<br>146.811    |
| $\alpha, \beta, \gamma$ (°)           | 90 90 90                   | 90 90 90                      | 90 90 90                         |
| Resolution* (Å)                       | 34.54 - 2.8 (2.9<br>- 2.8) | 59.96 - 2.4 (2.486<br>- 2.4)  | 38.97 - 3.601<br>(3.729 - 3.601) |
| R <sub>merge</sub> *                  | 0.1202 (0.7207)            | 0.1062<br>(0.6875)            | 0.1909<br>(0.5691)               |
| I/ $\sigma$ *                         | 9.28 (2.14)                | 8.34 (2.19)                   | 6.10 (3.15)                      |
| Completeness* (%)                     | 95.78 (97.67)              | 97.12 (98.49)                 | 99.69 (100.00)                   |
| Multiplicity*                         | 5.3 (5.0)                  | 5.1 (5.2)                     | 4.9 (5.1)                        |
| Refinement                            |                            |                               |                                  |
| Resolution (Å)                        | 34.54 - 2.8                | 59.96 - 2.4                   | 38.97 - 3.601                    |
| No. of Reflections                    | 65847                      | 102763                        | 30048                            |
| R <sub>work</sub> / R <sub>free</sub> | 0.1955/ 0.2309             | 0.1988/0.2002                 | 0.1819 /0.2176                   |
| No. of Atoms                          |                            |                               |                                  |
| Protein                               | 2336                       | 2410                          | 2420                             |
| Ligands/ion                           | 36                         | 34                            | 37                               |
| Water                                 | 33                         | 92                            | 0                                |
| B-factors                             |                            |                               |                                  |
| Protein                               | 58.18                      | 55.70                         | 68.02                            |
| Ligand/ion                            | 64.06                      | 62.91                         | 64.74                            |
| Water                                 | 48.50                      | 55.79                         | -                                |
| R.m.s deviations                      |                            |                               |                                  |
| Bond lengths (Å)                      | 0.003                      | 0.009                         | 0.002                            |
| Bond angles (°)                       | 0.53                       | 0.95                          | 0.54                             |
| Ramachandran                          |                            |                               |                                  |
| Most favored                          | 93.73                      | 94.60                         | 92.28                            |
| Allowed                               | 5.57                       | 4.32                          | 6.71                             |
| Outliers                              | 0.70                       | 1.08                          | 1.01                             |

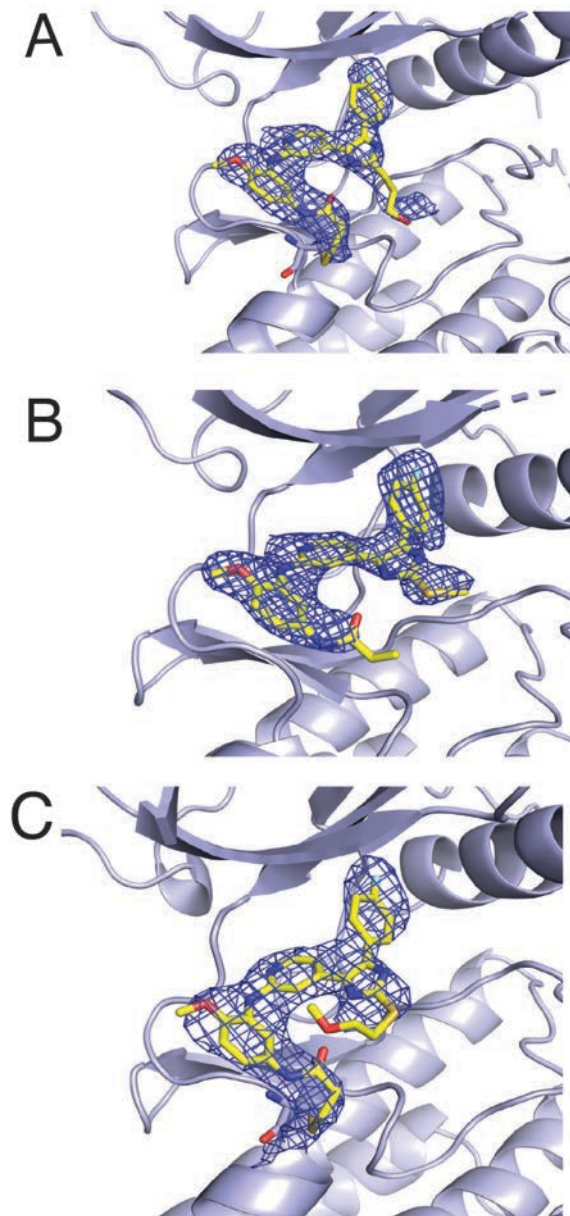

**Figure S4.** mFo-Fc omit maps for WT EGFR crystal structures with ligand and chloride ion generated by PHENIX for A) 3 B) 4 C) 5 (contour level 1.5  $\sigma$ ).



**Table S3.** Crystallographic data collection and refinement statistics of intermediate **26**

|                                              |                                                                                                    |
|----------------------------------------------|----------------------------------------------------------------------------------------------------|
| Space group                                  | P -1 (triclinic)                                                                                   |
| Cell dimensions                              | determinate from 10562 reflections with $2.6^\circ < \theta < 28.4^\circ$                          |
| a,b,c (Å)                                    | 8.1901(7), 8.9234(8), 9.1834(9)                                                                    |
| $\beta$ (°)                                  | 92.006(7)                                                                                          |
| V (Å <sup>3</sup> ), z                       | 568.54(10), 2                                                                                      |
| Crystal size (mm <sup>3</sup> )              | 0.11 x 0.28 x 0.50 (colorless block)                                                               |
| Range of Measurement                         | $2^\circ \leq \theta \leq 28^\circ$ $-10 \leq h \leq 10$ $-11 \leq k \leq 11$ $-11 \leq l \leq 12$ |
| No. of reflections:                          |                                                                                                    |
| Measured                                     | 4968                                                                                               |
| Unique                                       | 2691 ( $R_{\text{int}} = 0.0468$ )                                                                 |
| Observed ( $ F /\sigma(F) > 4.0$ )           | 2348 ( $ F /\sigma(F) > 4.0$ )                                                                     |
| <b>Refinement</b>                            |                                                                                                    |
| Nr. of parameters                            | 147                                                                                                |
| wR2                                          | 0.1368                                                                                             |
| R1(observed), R(all)                         | 0.0506, 0.0601                                                                                     |
| Goodness of Fit                              | 1.063                                                                                              |
| Max. deviation of parameters                 | 0.001 * e.s.d                                                                                      |
| Max. Peak final                              |                                                                                                    |
| diff. Fourier synthesis (e Å <sup>-3</sup> ) | 1.3, -1.92                                                                                         |

**Figure S5:** X-ray structure of regioisomeric pure intermediate **26**

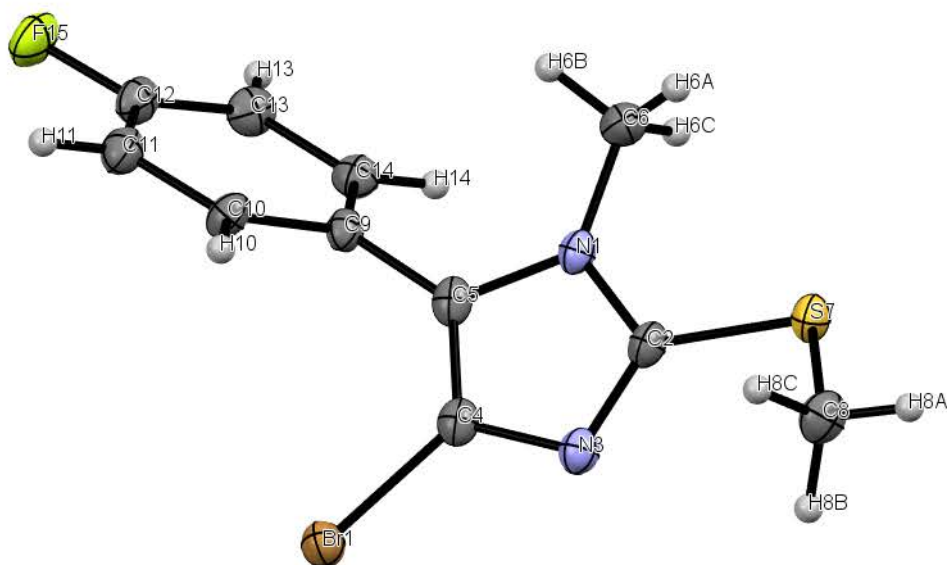

**Table S4.** Inhibitory activities of structurally characterized imidazole inhibitors not presented in Table 1.

| compound # | IC <sub>50</sub> (EGFR-L858R/T790M) | IC <sub>50</sub> (EGFR-L858R/T790M/C797S) |
|------------|-------------------------------------|-------------------------------------------|
| 1          | 6.6 nM                              | 21 nM                                     |
| 2          | 14 nM                               | 6 nM                                      |
| 3          | < 0.5 nM                            | 8 nM                                      |
| 5          | 1 nM                                | 35 nM                                     |

***N*-(3-Bromo-4-methoxyphenyl)acrylamide:**

1.00 g (4.95 mmol) 3-Bromo-4-methoxyaniline was dissolved in 10 ml dry THF and 10 ml of a 1 M NaHCO<sub>3</sub> solution was added slowly. After cooling the biphasic mixture down to 0 °C, 420 μl (5.20 mmol) acryloyl chloride was added dropwise under vigorous stirring. After complete addition the reaction mixture was warmed to room temperature and quenched by the addition of a saturated NH<sub>4</sub>Cl solution. The aqueous phase was extracted three times with DCM. The combined organic layers were dried over Na<sub>2</sub>SO<sub>4</sub>, filtered and the volatiles evaporated under reduced pressure. The crude product was triturated with DCM to give the title compound in 80 % yield (1.01g, 3.96 mmol). <sup>1</sup>H NMR (200 MHz, DMSO) δ 10.13 (s, 1H), 8.01 (d, J = 2.4 Hz, 1H), 7.55 (dd, J = 8.9, 2.5 Hz, 1H), 7.09 (d, J = 9.0 Hz, 1H), 6.47 – 6.16 (m, 2H), 5.81 – 5.68 (m, 1H), 3.81 (s, 3H). <sup>13</sup>C NMR (50 MHz, DMSO) δ 162.94, 151.57, 133.06, 131.64, 126.87, 123.84, 119.81, 112.77, 110.12, 56.30. ESI-MS: 256.1/257.1 [M+H]<sup>+</sup>.
